# Supplementary material for: Piperacillin/Tazobactam Co-Delivery by Micellar Ionic Conjugate Systems Carrying Pharmaceutical Anions and Encapsulated Drug
Source: MDPI journal article supplement (doi:10.3390/pharmaceutics16020198), 2024-01-30
Supplement: s1 [file s1]

# **Piperacillin/Tazobactam Co-Delivery by Micellar Ionic Conjugate Systems Carrying Pharmaceutical Anions and Encapsulated Drug**

Katarzyna Niesyto, Aleksy Mazur and Dorota Neugebauer \*

Department of Physical Chemistry and Technology of Polymers, Faculty of Chemistry,  
Silesian University of Technology, 44-100 Gliwice, Poland;  
katarzyna.niesyto@polsl.pl (K.N.); aleksy.mazur@polsl.pl (A.M.)

\* Correspondence: dorota.neugebauer@polsl.pl

## **Content:**

**Figure S1.** DLS histograms for nanoparticles based on a) GP1, b) GP2, and c) GP3 copolymer.

**Figure S2.** Kinetics profiles by models of first order, Higuchi and Korsmeyer-Peppas for release of TAZ from a) single and b) dual systems; as well as PIP release from c) single and d) dual systems based on the grafted copolymers.

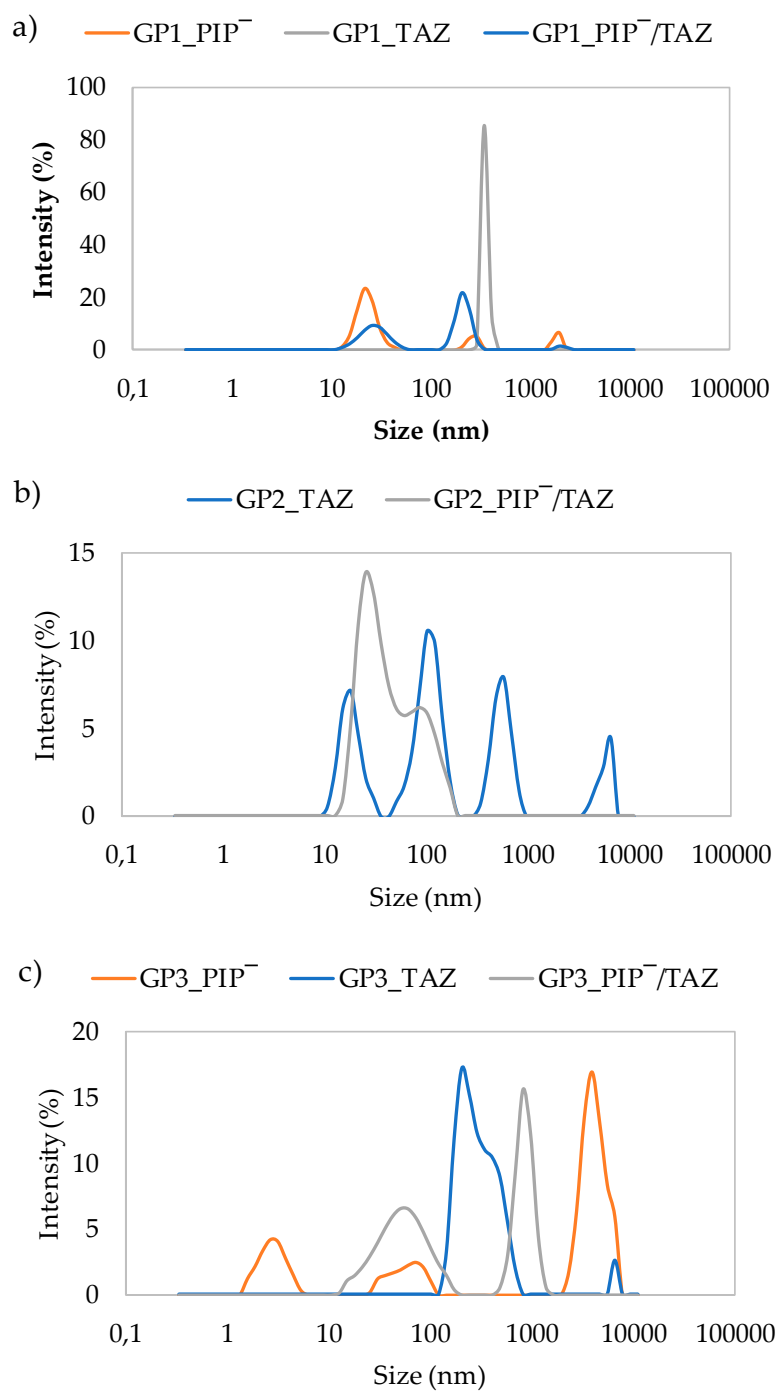

**Figure S1.** DLS histograms for nanoparticles based on a) GP1, b) GP2, and c) GP3 copolymer.

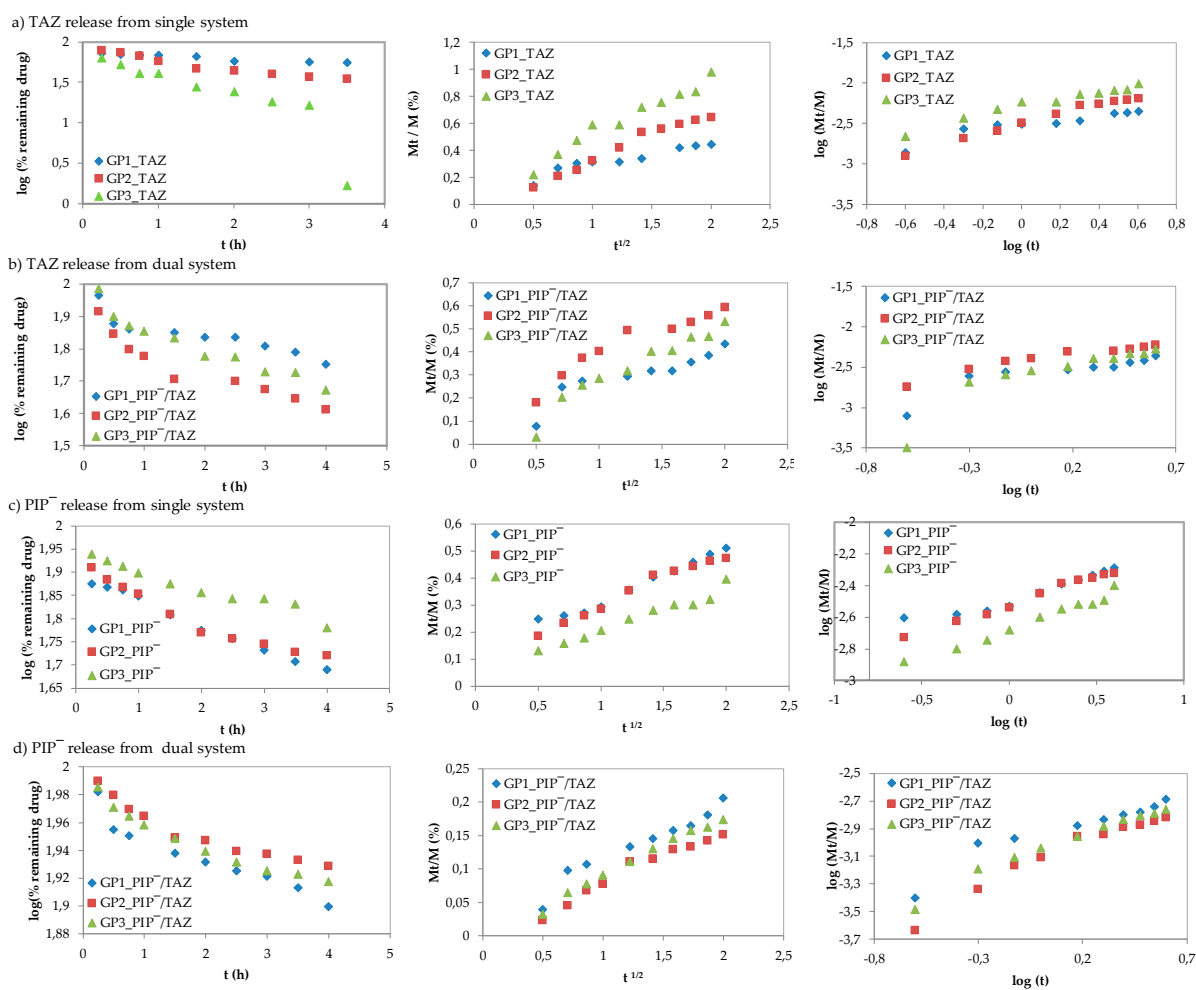

**Figure S2.** Kinetics profiles by models of first order (left column), Higuchi (central column) and Korsmeyer-Peppas (right column) for release of TAZ from a) single and b) dual systems; as well as PIP<sup>-</sup> release from c) single and d) dual systems based on the grafted copolymers.
